# Supplementary material
Source: ML conference proceedings conference paper supplement (https://openaccess.thecvf.com/content/WACV2024/html/Cha_3D_Reconstruction_of_WACV_2024_paper.html)
Supplement: Supplementary file 1 [file Cha_3D_Reconstruction_of_WACV_2024_supplemental.zip]

Archive with 2 entries (2 files):
- 1861-supp.mp4
- 1861-supp.pdf
